# Supplementary material
Source: PubMed Central journal article supplement (PMC4187845)
Supplement: IAI.01532-13_zii999090826so1.pdf [file IAI.01532-13_zii999090826so1.pdf]

Table S1. Primers and probes

| Primer name    | Sequence                                             |
|----------------|------------------------------------------------------|
| poxAfor        | 5'-CCTGAAGTTACGGTCTGCGAAC-3'                         |
| poxArev        | 5'-TGTGAGGCATGAAACCATCCTTC-3'                        |
| efpfor         | 5'-TCGATAAATGAGCGGGGCACAC-3'                         |
| efprev         | 5'-CGTGCTGGCAAGCAAAACAAG-3'                          |
| yjeKfor        | 5'-CAGCGGAATCAGTAGATTTGAAGG-3'                       |
| yjeKrev        | 5'-CTGTACTTGCGTTTGTGCTCTTG-3'                        |
| AXyjeKfor2     | 5'-GATAATCCAGGACATATCAGGCTCC-3'                      |
| AXyjeKrev2     | 5'-TGAAATCAAGCATTCGGCGAG-3'                          |
| yjeKHI         | 5'-CGGATTGCCTTTCTCCATGC-3'                           |
| yjeKHIantiP1   | 5'-GAGAAAGGCAATCCGATTCCGGGGATCCGTCGACC-3'            |
| yfcMfor        | 5'-TGGTGTTGAGCAAAGACAA-3'                            |
| yfcMrev        | 5'-TCTGCGATGGCTAATGTCAG-3'                           |
| cpxArev        | 5'-CGGTTGTGGGGAAAATAACCC-3'                          |
| cpxRfor        | 5'-TCGGCAGGTTGCAGGGAATATC-3'                         |
| cpxRc153a      | 5'-AGCATTGATTTTGCTTGAAGTAATGATGCCGAAGAAAAATGG-3'     |
| cpxRc153a anti | 5'-CCATTTTCTTCGGCATCATTACTTCAAGCAAAAGTAAATCAATGCT-3' |

*Primers for RT-PCR*

|             |                                          |
|-------------|------------------------------------------|
| VirF5'JCFor | 5'-CAAAAAGGTGTTCAATGACGGTTA-3'           |
| VirF5'JCRev | 5'-TTTGCCCTTCATCGATAGTCAA-3'             |
| VirB2for    | 5'-TCCAATCGCGTCAGAACTTAACT-3'            |
| VirB2rev    | 5'-CCTTTAATATTGGTAGTGTAGAACTAAGAGATTC-3' |
| ipaCfor     | 5'-CCTGGCAGCCCTATCATCAA-3'               |
| ipaCrev     | 5'-GCACCGATACCCGTTATACCTACTT'5'          |
| cpxAfor     | 5'-ACGCTGGTGCTGGTGTTGA-3'                |
| cpxArev     | 5'-GCTATCCAGAAGCTCGGTCATCT-3'            |

*Probes for RT-PCR*

|             |                                      |
|-------------|--------------------------------------|
| VirF probe  | 6FAM-5' CTCAGGCAATGAAAC-3' MGBNFQ    |
| VirB2 probe | 6FAM-5' AGGACTGAAAAGGC-3' MGBNFQ     |
| ipaC probe  | 6FAM 5'-CATTACTGGAGCAGTCAC-3' MGBNFQ |
| cpxA probe  | 6FAM 5'-ACCCAAGCTCGATTCA-3' MGBNFQ   |

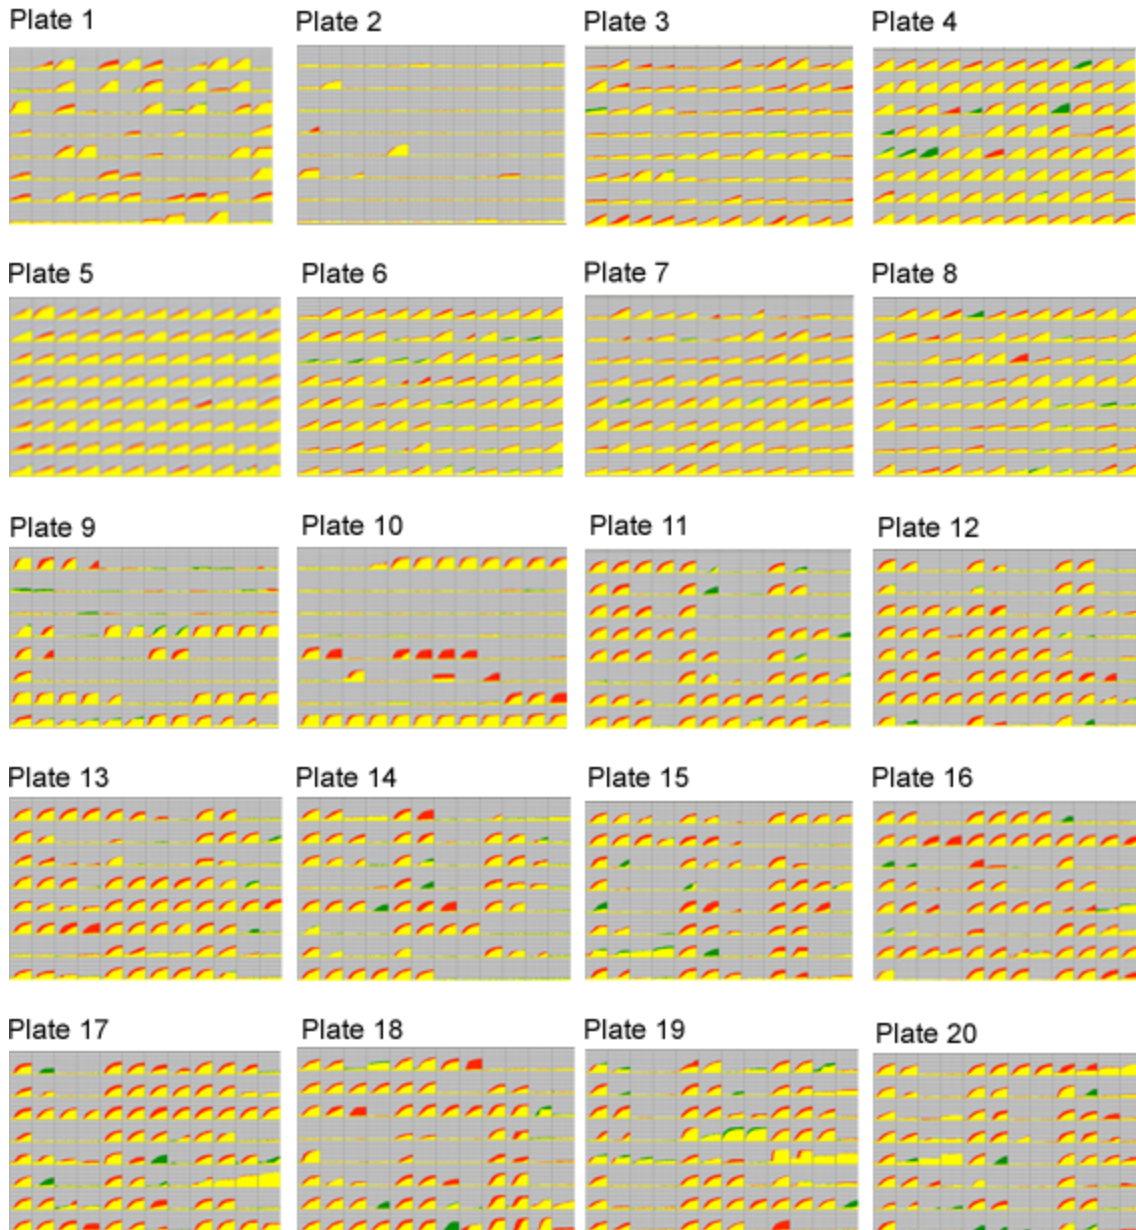

Figure S1. Biolog phenotype microarray analysis of *S. flexneri efp* mutant reveals few metabolic changes compared to WT. Each well tests respiration under a specific growth condition, measured by reduction of a tetrazolium dye. Respiration of 2457T is in red,  $\Delta efp$  (HMS100) is in green. Yellow areas denote overlap in respiration profiles. Detailed description of plates can be found at: <http://www.biolog.com>.
